# Supplementary material for: Identification of a novel cytochrome P450 17A1 enzyme and its molecular engineering
Source: Royal Society of Chemistry journal article supplement (doi:10.1039/d2cy01605b), 2022-12-07
Supplement: d2cy01605b1.pdf [file d2cy01605b1.pdf]

**Supporting Information**  
**Identification of a novel cytochrome P450 17A1 enzyme and its molecular engineering**

Kexin Chen<sup>1,2#</sup>, Chao Liu<sup>1,2#</sup>, Xian Zhang<sup>1,2</sup>, Zhenghong Xu<sup>1</sup>, Minglong Shao<sup>1,2</sup>, Taowei Yang<sup>1,2\*</sup>, Zhiming Rao<sup>1,2\*</sup>

<sup>1</sup>Key Laboratory of Industrial Biotechnology, Ministry of Education, School of Biotechnology, Jiangnan University, Wuxi 214122, China

<sup>2</sup>Laboratory of Applied Microorganisms and Metabolic Engineering, School of Biotechnology, Jiangnan University, Wuxi 214122, China

**\*Corresponding authors:**

Zhiming Rao, Tel: +86-510-85916881, E-mail: [raozhm@jiangnan.edu.cn](mailto:raozhm@jiangnan.edu.cn)

Taowei Yang, Tel: +86-510-85916881, E-mail: [ytw1228@163.com](mailto:ytw1228@163.com)

**Present/permanent address:** Jiangnan University, No. 1800 Lihu Avenue, Wuxi, Jiangsu, 214122, China

#Kexin Chen and Chao Liu contributed equally to this work



**Figure S1** Phylogenetic tree of the retrieved sequences of CYP17A1 proteins together with the probe 6CIZ. The tree was constructed with the neighbor-joining method by using the MEGA 6 program. The probe sequence (6CIZ) was boxed in red (No. 1); three selected sequences were boxed in green (No. 2,3,4 in turn).

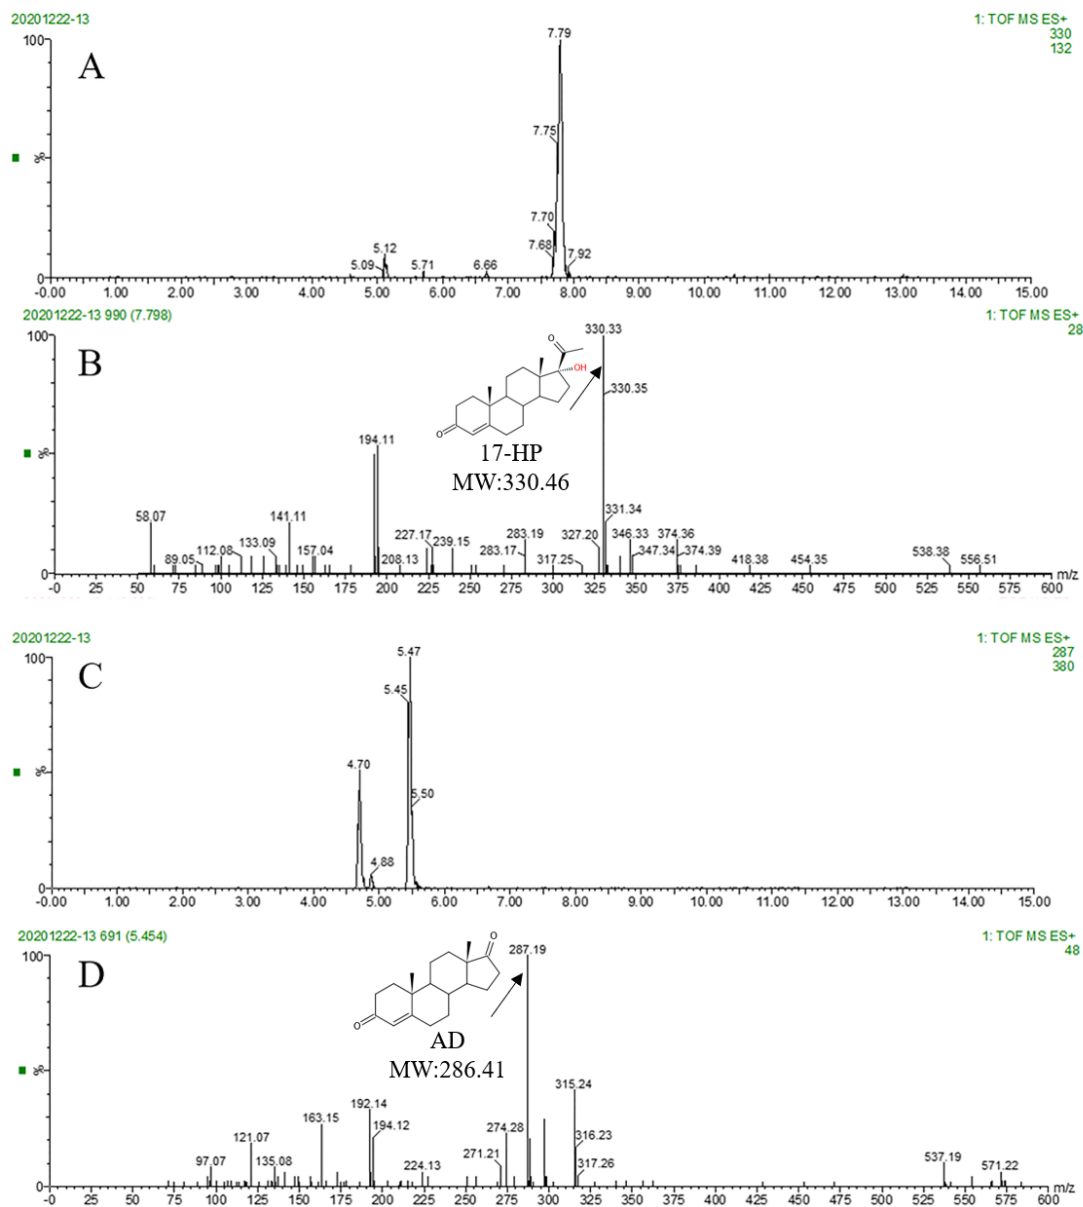

**Figure S2** LC-MS analysis of the whole-cell catalytic solution for recombinant *P. pastoris* containing BT\_CYP17A1. A, the HPLC profiles of solution for 17-HP detection; B, MS spectrum of solution for 17-HP detection. C, the HPLC profiles of solution for AD detection; D, MS spectrum of solution for AD detection.

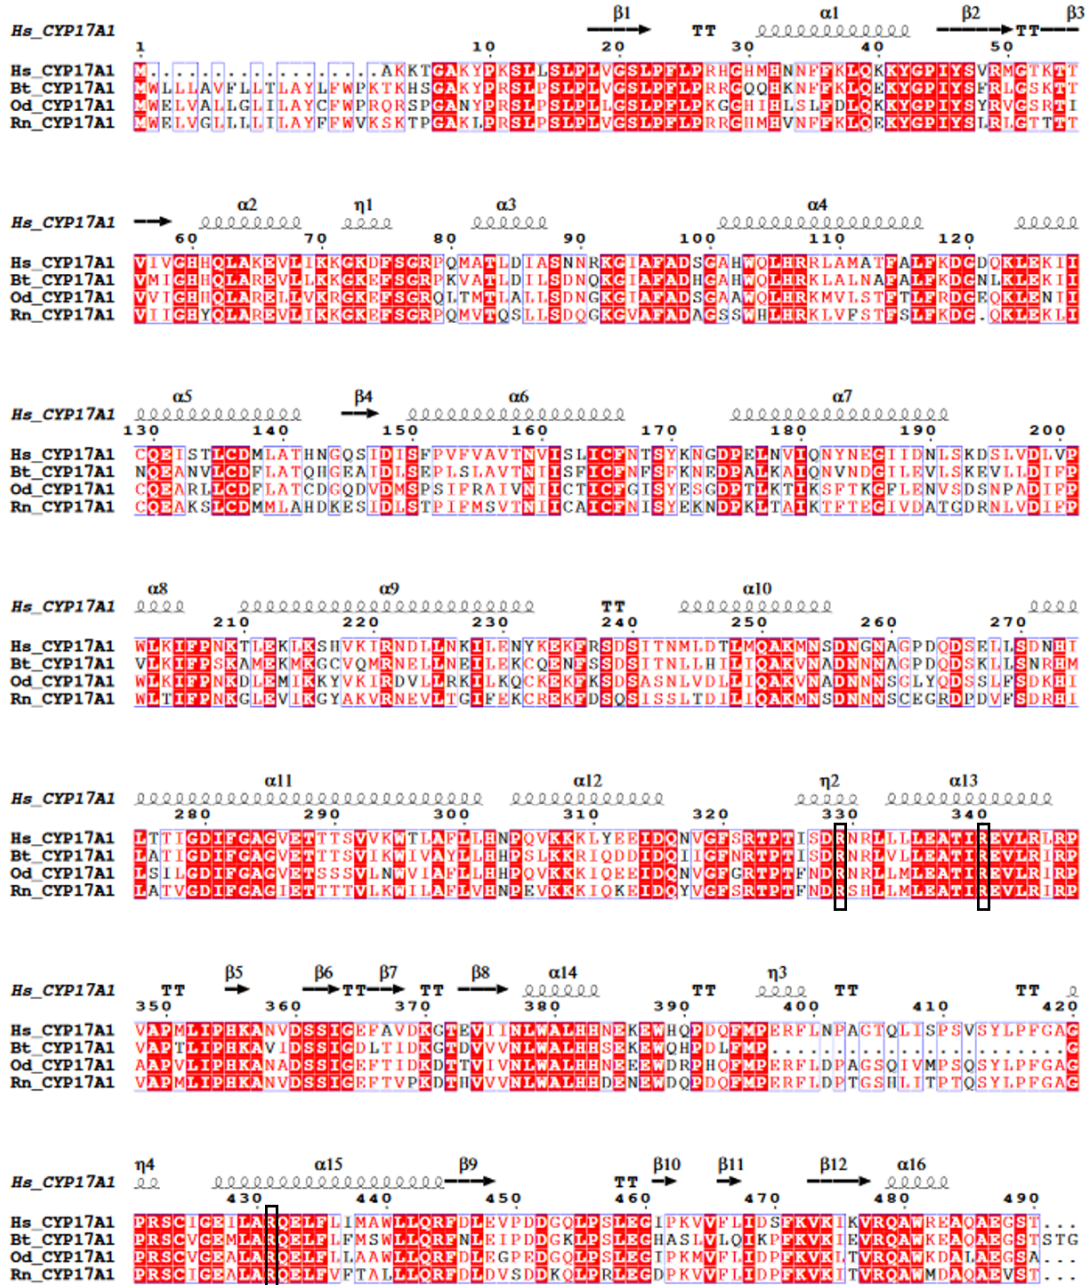

Figure S3 Results of multiple sequence alignment for CYP17A1s, the key amino acid residues were marked in black.

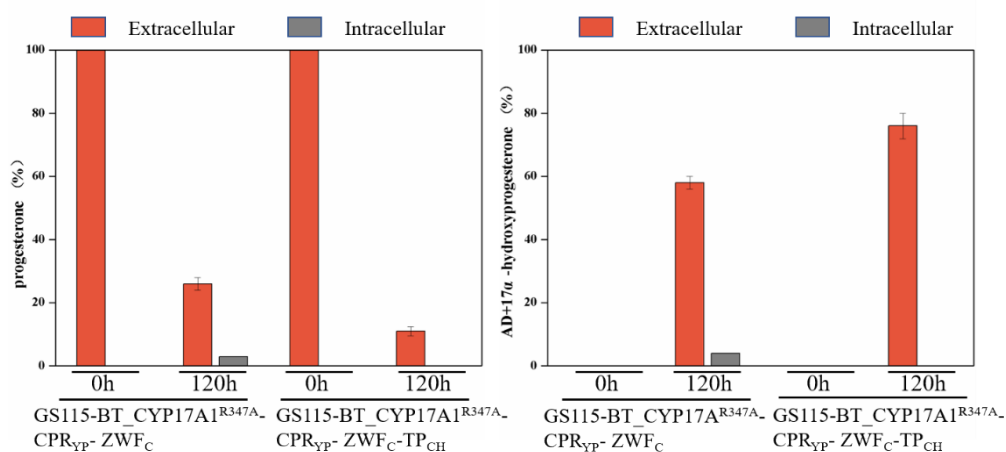

**Figure S4** The exogenous TP<sub>CH</sub> transporter facilitated acetylated corticolone substrate transportation in *Pichia pastoris*. The extracellular and intracellular progesterone or 17 $\alpha$ -hydroxyprogesterone concentrations in strain GS115-BT\_CYP17A1<sup>R347A</sup>-CPR<sub>YP</sub>-ZWF<sub>C</sub> and GS115-BT\_CYP17A1<sup>R347A</sup>-CPR<sub>YP</sub>-ZWF<sub>C</sub>-TP<sub>CH</sub> were measured after the biotransformation. The description of each strain was listed in Table S2. Cell mass was determined by 30 measuring the optical density at 600 nm (OD<sub>600</sub>), OD<sub>600</sub> 1=0.35±0.01 g<sub>CDW</sub>/L, and the cytoplasmic volume was assumed to be 1.6  $\mu$ L/mg dry cell weight<sup>1</sup>

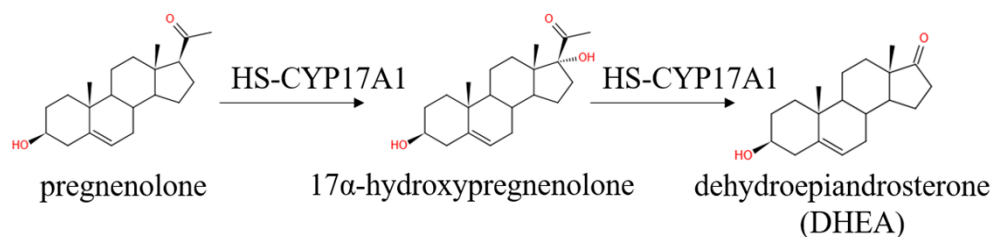

**Figure S5** Reaction catalyzed by HS\_CYP17A1 enzyme.

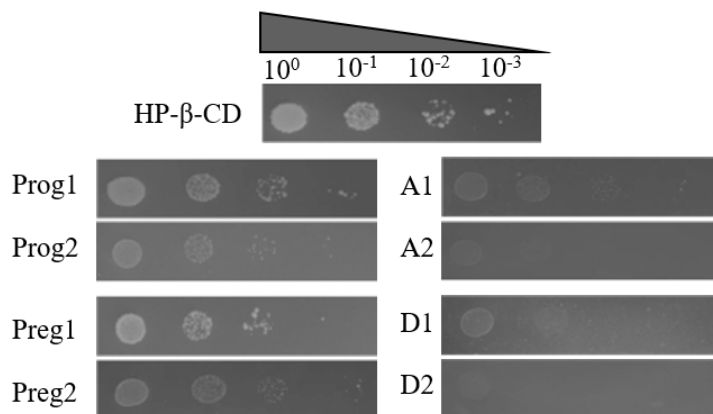

**Figure S6** Inhibition of growth of *Pichia pastoris* by steroid. Serial 10-fold dilutions of OD<sub>600</sub> 1 cell suspensions were spotted on agar slants containing 0.1mM (1) and 1mM (2) concentrations of steroids. After two days growth was compared to that of control containing only HP-β-CD  
 Prog: progesterone, Preg: pregnenolone, A: androstenedione, DHEA: dehydroepiandrosterone

**Table S1** Strains and plasmids used in this study

| Strains and plasmids                                                                     | Description                                                                                                                                                                                                                                                                    | Source                           |
|------------------------------------------------------------------------------------------|--------------------------------------------------------------------------------------------------------------------------------------------------------------------------------------------------------------------------------------------------------------------------------|----------------------------------|
| Strains                                                                                  |                                                                                                                                                                                                                                                                                |                                  |
| <i>E. coli</i> JM109                                                                     | endA1 glnV44 thi-1 relA1 gyrA96 recA1 mcrB+ &Delta;(lac-proAB) e14- [F' traD36 proAB+ lacIq lacZ&Delta;M15]hsdR17(rK-mK+)                                                                                                                                                      | Beijing ComWin Biotech Co., Ltd. |
| <i>P. pastoris</i> GS115                                                                 | Wild type                                                                                                                                                                                                                                                                      | Invitrogen                       |
| GS115-CK1                                                                                | <i>P. pastoris</i> GS115 electro-transformed with pPIC3.5K empty vector as control                                                                                                                                                                                             | <sup>2</sup>                     |
| GS115-CK2                                                                                | <i>P. pastoris</i> GS115 electro-transformed with pPICZB empty vector as control                                                                                                                                                                                               | <sup>2</sup>                     |
| GS115-CK3                                                                                | <i>P. pastoris</i> GS115 electro-transformed with pPIC3.5K and pPICZB empty vector as control                                                                                                                                                                                  | <sup>2</sup>                     |
| GS115-MA_CYP17A2                                                                         | <i>P. pastoris</i> GS115 electro-transformed with pPIC3.5K- <i>ma_cyp17a2</i> , expressing the <i>ma_cyp17a2</i> gene alone                                                                                                                                                    | <sup>3</sup>                     |
| GS115-MA_CYP17A2-CPR <sub>RAT</sub> -ZWF <sub>K</sub>                                    | <i>P. pastoris</i> GS115-MA_CYP17A2 electro-transformed with binary-pPICZB- <i>cpr<sub>rat</sub>-zwf<sub>k</sub></i> , co-expressing the <i>ma_cyp17a2</i> , <i>cpr<sub>rat</sub></i> and <i>zwf<sub>k</sub></i> genes                                                         | <sup>3</sup>                     |
| GS115-HS_CYP17A1                                                                         | <i>P. pastoris</i> GS115 electro-transformed with pPIC3.5K- <i>hs_cyp17a1</i> , expressing the <i>hs_cyp17a1</i> gene alone                                                                                                                                                    | <sup>2</sup>                     |
| GS115-HS_CYP17A1-CPR <sub>YP</sub> -ZWF <sub>C</sub>                                     | <i>P. pastoris</i> GS115-HS_CYP17A1 electro-transformed with binary-pPICZB- <i>cpr<sub>yp</sub>-zwf<sub>c</sub></i> , co-expressing the <i>hs_cyp17a1</i> , <i>cpr<sub>yp</sub></i> and <i>zwf<sub>c</sub></i> genes                                                           | <sup>2</sup>                     |
| GS115-BT_CYP17A1                                                                         | <i>P. pastoris</i> GS115 electro-transformed with pPIC3.5K- <i>bt_cyp17a1</i> , expressing the <i>bt_cyp17a1</i> gene alone                                                                                                                                                    |                                  |
| GS115-OD_CYP17A1                                                                         | <i>P. pastoris</i> GS115 electro-transformed with pPIC3.5K- <i>od_cyp17a1</i> , expressing the <i>od_cyp17a1</i> gene alone                                                                                                                                                    |                                  |
| GS115-RT_CYP17A1                                                                         | <i>P. pastoris</i> GS115 electro-transformed with pPIC3.5K- <i>rt_cyp17a1</i> , expressing the <i>rt_cyp17a1</i> gene alone                                                                                                                                                    |                                  |
| GS115-BT_CYP17A1 <sup>R347A</sup>                                                        | <i>P. pastoris</i> GS115 electro-transformed with pPIC3.5K- <i>bt_cyp17a1</i> <sup>R347A</sup> , expressing the <i>hs_cyp17a2</i> <sup>R347A</sup> gene alone                                                                                                                  |                                  |
| GS115-BT_CYP17A1 <sup>R347A</sup> -TP <sub>AC</sub>                                      | <i>P. pastoris</i> GS115 electro-transformed with pPIC3.5K- <i>bt_cyp17a1</i> <sup>R347A</sup> - <i>tp<sub>ac</sub></i> , expressing the <i>bt_cyp17a1</i> <sup>R347A</sup> and <i>tp<sub>ac</sub></i> genes                                                                   | This study                       |
| GS115-BT_CYP17A1 <sup>R347A</sup> -TP <sub>CH</sub>                                      | <i>P. pastoris</i> GS115 electro-transformed with pPIC3.5K- <i>bt_cyp17a1</i> <sup>R347A</sup> - <i>tp<sub>ch</sub></i> , expressing the <i>bt_cyp17a1</i> <sup>R347A</sup> and <i>tp<sub>ch</sub></i> genes                                                                   | This study                       |
| GS115-BT_CYP17A1 <sup>R347A</sup> -TP <sub>CL</sub>                                      | <i>P. pastoris</i> GS115 electro-transformed with pPIC3.5K- <i>bt_cyp17a1</i> <sup>R347A</sup> - <i>tp<sub>cl</sub></i> , expressing the <i>bt_cyp17a1</i> <sup>R347A</sup> and <i>tp<sub>cl</sub></i> genes                                                                   | This study                       |
| GS115-BT_CYP17A1 <sup>R347A</sup> -TP <sub>EV</sub>                                      | <i>P. pastoris</i> GS115 electro-transformed with pPIC3.5K- <i>bt_cyp17a1</i> <sup>R347A</sup> - <i>tp<sub>ev</sub></i> , expressing the <i>bt_cyp17a1</i> <sup>R347A</sup> and <i>tp<sub>ev</sub></i> genes                                                                   | This study                       |
| GS115-BT_CYP17A1 <sup>R347A</sup> -TP <sub>NF</sub>                                      | <i>P. pastoris</i> GS115 electro-transformed with pPIC3.5K- <i>bt_cyp17a1</i> <sup>R347A</sup> - <i>tp<sub>nf</sub></i> , expressing the <i>bt_cyp17a1</i> <sup>R347A</sup> and <i>tp<sub>nf</sub></i> genes                                                                   | This study                       |
| GS115-BT_CYP17A1 <sup>R347A</sup> -TP <sub>SC</sub>                                      | <i>P. pastoris</i> GS115 electro-transformed with pPIC3.5K- <i>bt_cyp17a1</i> <sup>R347A</sup> - <i>tp<sub>sc</sub></i> , expressing the <i>bt_cyp17a1</i> <sup>R347A</sup> and <i>tp<sub>sc</sub></i> genes                                                                   | This study                       |
| GS115-BT_CYP17A1 <sup>R347A</sup> -CPR <sub>YP</sub> -ZWF <sub>C</sub> -TP <sub>CH</sub> | GS115-BT_CYP17A1 <sup>R347A</sup> -TP <sub>CH</sub> electro-transformed with binary-pPICZB- <i>cpr<sub>yp</sub>-zwf<sub>c</sub></i> , co-expressing the <i>bt_cyp17a1</i> <sup>R347A</sup> , <i>tp<sub>ch</sub></i> , <i>cpr<sub>yp</sub></i> and <i>zwf<sub>c</sub></i> genes | This study                       |
| GS115-HS_CYP17A1-TP <sub>CH</sub>                                                        | <i>P. pastoris</i> GS115 electro-transformed with pPIC3.5K-                                                                                                                                                                                                                    | This study                       |

|                                                                        |                                                                                                                                                                                                                                                                                                                                                                                                                             |              |
|------------------------------------------------------------------------|-----------------------------------------------------------------------------------------------------------------------------------------------------------------------------------------------------------------------------------------------------------------------------------------------------------------------------------------------------------------------------------------------------------------------------|--------------|
| GS115-HS_CYP17A1-CPR <sub>YP</sub> -ZWF <sub>C</sub> -TP <sub>CH</sub> | <i>hs_cyp17a1</i> <sup>R347A</sup> - <i>tp<sub>ch</sub></i> , expressing the <i>hs_cyp17a1</i> <sup>R347A</sup> and <i>tp<sub>ch</sub></i> genes<br><i>P. pastoris</i> GS115-HS_CYP17A1-TP <sub>CH</sub> electro-transformed with binary-pPICZB- <i>cpr<sub>yp</sub></i> - <i>zwf<sub>c</sub></i> , co-expressing the <i>hs_cyp17a1</i> , <i>cpr<sub>yp</sub></i> , <i>zwf<sub>c</sub></i> and <i>tp<sub>ch</sub></i> genes | This study   |
| Plasmid                                                                |                                                                                                                                                                                                                                                                                                                                                                                                                             |              |
| pPIC3.5K                                                               | 9.0 kb, Amp <sup>R</sup>                                                                                                                                                                                                                                                                                                                                                                                                    | Invitrogen   |
| pPICZB                                                                 | 3.3 kb, Zeo <sup>R</sup>                                                                                                                                                                                                                                                                                                                                                                                                    | Invitrogen   |
| pPIC3.5K- <i>ma_cyp17a2</i>                                            | pPIC3.5K carrying a CYP17A2 gene from <i>Mastacembelus armatus</i>                                                                                                                                                                                                                                                                                                                                                          | <sup>3</sup> |
| pPIC3.5K- <i>hscyp17a1</i>                                             | pPIC3.5K carrying a CYP17A1 gene from <i>Homo sapiens</i>                                                                                                                                                                                                                                                                                                                                                                   | <sup>2</sup> |
| pPICZB- <i>cpr<sub>rat</sub></i> - <i>zwf<sub>k</sub></i>              | pPICZB carrying a CPR gene from <i>Rattus norvegicus</i> and a <i>zwf</i> gene from <i>Kluyveromyces lactis</i>                                                                                                                                                                                                                                                                                                             | <sup>3</sup> |
| pPICZB- <i>cpr<sub>yp</sub></i> - <i>zwf<sub>c</sub></i>               | pPICZB carrying a CPR gene from <i>Yorkshire pig</i> and a <i>zwf</i> gene from <i>Candida tropicalis</i>                                                                                                                                                                                                                                                                                                                   | <sup>2</sup> |
| pPIC3.5K- <i>tp<sub>ac</sub></i>                                       | pPIC3.5K carrying a transporter gene from <i>Aspergillus clavatus</i>                                                                                                                                                                                                                                                                                                                                                       | This study   |
| pPIC3.5K- <i>tp<sub>ch</sub></i>                                       | pPIC3.5K carrying a transporter gene from <i>Cochliobolus heterostrophus</i>                                                                                                                                                                                                                                                                                                                                                | This study   |
| pPIC3.5K- <i>tp<sub>cl</sub></i>                                       | pPIC3.5K carrying a transporter gene from <i>Cochliobolus lunatus</i>                                                                                                                                                                                                                                                                                                                                                       | This study   |
| pPIC3.5K- <i>tp<sub>ev</sub></i>                                       | pPIC3.5K carrying a transporter gene from <i>Emericella variicolor</i>                                                                                                                                                                                                                                                                                                                                                      | This study   |
| pPIC3.5K- <i>tp<sub>nf</sub></i>                                       | pPIC3.5K carrying a transporter gene from <i>Neosartorya fumigata</i>                                                                                                                                                                                                                                                                                                                                                       | This study   |
| pPIC3.5K- <i>tp<sub>sc</sub></i>                                       | pPIC3.5K carrying a transporter gene from <i>Saccharomyces cerevisiae</i>                                                                                                                                                                                                                                                                                                                                                   | This study   |
| pPIC3.5K- <i>bt_cyp17a1</i> <sup>R347A</sup> - <i>tp<sub>ac</sub></i>  | pPIC3.5K carrying a CYP17A1 gene from <i>Bovine taurus</i> and a transporter gene from <i>Aspergillus clavatus</i>                                                                                                                                                                                                                                                                                                          | This study   |
| pPIC3.5K- <i>bt_cyp17a1</i> <sup>R347A</sup> - <i>tp<sub>ch</sub></i>  | pPIC3.5K carrying a CYP17A1 gene from <i>Bovine taurus</i> and a transporter gene from <i>Cochliobolus heterostrophus</i>                                                                                                                                                                                                                                                                                                   | This study   |
| pPIC3.5K- <i>bt_cyp17a1</i> <sup>R347A</sup> - <i>tp<sub>cl</sub></i>  | pPIC3.5K carrying a CYP17A2 gene from <i>Bovine taurus</i> and a transporter gene from <i>Cochliobolus lunatus</i>                                                                                                                                                                                                                                                                                                          | This study   |
| pPIC3.5K- <i>bt_cyp17a1</i> <sup>R347A</sup> - <i>tp<sub>ev</sub></i>  | pPIC3.5K carrying a CYP17A2 gene from <i>Bovine taurus</i> and a transporter gene from <i>Emericella variicolor</i>                                                                                                                                                                                                                                                                                                         | This study   |
| pPIC3.5K- <i>bt_cyp17a1</i> <sup>R347</sup> - <i>tp<sub>nf</sub></i>   | pPIC3.5K carrying a CYP17A2 gene from <i>Bovine taurus</i> and a transporter gene from <i>Neosartorya fumigata</i>                                                                                                                                                                                                                                                                                                          | This study   |
| pPIC3.5K- <i>bt_cyp17a1</i> <sup>R347</sup> - <i>tp<sub>sc</sub></i>   | pPIC3.5K carrying a CYP17A2 gene from <i>Bovine taurus</i> and a transporter gene from <i>Saccharomyces cerevisiae</i>                                                                                                                                                                                                                                                                                                      | This study   |
| pPIC3.5K- <i>hscyp17a1</i> - <i>tp<sub>ch</sub></i>                    | pPIC3.5K carrying a CYP17A1 gene from <i>Homo sapiens</i> and a transporter gene from <i>Cochliobolus</i>                                                                                                                                                                                                                                                                                                                   | This study   |



*heterostrophus*

---

**Table S2** Primers used in this study

| Primer                                                                                                                                        | Sequence (5'-3')                                        |
|-----------------------------------------------------------------------------------------------------------------------------------------------|---------------------------------------------------------|
| The following primers were used for amplification and constructing the plasmid of pPIC3.5K- <i>tp<sub>ch</sub></i>                            |                                                         |
| TP <sub>CH</sub> -F                                                                                                                           | CATCATCACCATCACCATATGGGATTAAC TTTATTAC                  |
| TP <sub>CH</sub> -R                                                                                                                           | TTAGAATCTAGCAAGACCTTACGTCCTGGAACGTATAGT                 |
| 3.5K- TP <sub>CH</sub> -F                                                                                                                     | ACTATACGTTCCAGGACGTAAGGTCTTGCTAGATTCTAA                 |
| 3.5K- TP <sub>CH</sub> -R                                                                                                                     | GTAATAAAGTTAATCCCATATGGTGATGGTGATGATG                   |
| The following primers were used for elimination of the <i>Pme</i> I restriction site                                                          |                                                         |
| d <i>Pme</i> I-pPIC3.5K-F                                                                                                                     | AAACTGACAGTTGAAACGCTGTCTTGGAACCT                        |
| d <i>Pme</i> I-Ppic3.5K-R                                                                                                                     | CCAAGACAGCGTTTCAACTGTCAGTTTTGGG                         |
| The following primers were used for mutation                                                                                                  |                                                         |
| R347A-F                                                                                                                                       | CAACCATCTCAGACGCAAACCGTCTAGTACTGC                       |
| R347A-R                                                                                                                                       | GCAGTACTAGACGGTTTGCGTCTGAGATGGTTG                       |
| Primers were used for amplification and constructing the plasmid of pPIC3.5K- <i>bt<sub>cyp17a1-tp</sub></i> and pPIC3.5K- <i>hcyp17a1-tp</i> |                                                         |
| P-TP-T-F                                                                                                                                      | CTATATGCGTTGATGCAATTTCTATGCGATCTAACATCCAAAGAC<br>GAAAGG |
| P-TP-T-R                                                                                                                                      | CAGTGCTCCGAGAACGGGTGCTCTCACTTAATCTTCTGTACTCTGA<br>AG    |
| 3.5K-CYP F                                                                                                                                    | CCTTTCGTCTTTGGATGTTAGATCGCATAGAAATTGCATCAACGCA<br>TATAG |
| 3.5K-CYP R                                                                                                                                    | CTTCAGAGTACAGAAGATTAAGTGAGAGCACCCGTTCTCGGAGCA<br>CTG    |

**Table S3** Sequence identity percentages of four selected sequences of CYP17s. The identity percentages between two sequences were calculated using the on-line software SIAS (Sequence Identity and Similarity, <http://imed.med.ucm.es/Tools/sias.html>)

|            |            |            |            |            |
|------------|------------|------------|------------|------------|
| HS_CYP17A1 | 100%       |            |            |            |
| BT_CYP17A1 | 66.38%     | 100%       |            |            |
| OD_CYP17A1 | 66.59%     | 63.37%     | 100%       |            |
| RT_CYP17A1 | 67.64%     | 63.37%     | 67.06%     | 100%       |
|            | HS_CYP17A1 | BT_CYP17A1 | OD_CYP17A1 | RT_CYP17A1 |

**Table S4** Sequence identity percentages of six selected sequences of transporters. The identity percentages between two sequences were calculated using the on-line software SIAS (Sequence Identity and Similarity, <http://imed.med.ucm.es/Tools/sias.html>)

|                  |                  |                  |                  |                  |                  |                  |
|------------------|------------------|------------------|------------------|------------------|------------------|------------------|
| TP <sub>AC</sub> | 100%             |                  |                  |                  |                  |                  |
| TP <sub>CH</sub> | 82.15%           | 100%             |                  |                  |                  |                  |
| TP <sub>CL</sub> | 78.83%           | 75.06%           | 100%             |                  |                  |                  |
| TP <sub>EV</sub> | 84.85%           | 80.58%           | 76.64%           | 100%             |                  |                  |
| TP <sub>MF</sub> | 70.95%           | 68.33%           | 71.81%           | 68.56%           | 100%             |                  |
| TP <sub>SC</sub> | 57.53%           | 55.70%           | 56.38%           | 57.18%           | 57.18%           | 100%             |
|                  | TP <sub>AC</sub> | TP <sub>CH</sub> | TP <sub>CL</sub> | TP <sub>EV</sub> | TP <sub>MF</sub> | TP <sub>SC</sub> |

>TP<sub>Ac</sub> from *Aspergillus clavatus* (NCBI Reference Sequence:XP\_001276075.1,4341bp)

CACGACACATTCCTGGGGGGTGAATGCGACCCAGTATGCCAGCCACATGCGAGACGTGATCATGGCCATGTTTGGTATTAGCCATACGAAGAACACGATTGTAGGAAACGACTTCATTCGCGGCGTGTCTGGTGGAGAGCGCAAGCGGGTTAGCATCGCTGAAGCTTGCCTCAGCAATGCCACCGCTGCAATGTTGGGACAATTCAACTCGCGGCCTTGATAGTGCGAATGCCATTGAGTTC TGCAAAACGTTACGCATGCAGGCAGATATCAATGGCACCACAGCCTGTGTCTCTTATACC AAGCTCCTCAGGCCGCTTACGACTATTTTCGATAAGGCCCTGGTTCTATACGAAGGTCGCGA GATCTACTTTGGTCGCACATCCATGGCGAAGCAGTACTTCCTTGATATGGGCTTCGTTTGC CCTGATCGACAACTGATGCCGACTTTCTCACCTCTATGACTAGCCACCTTGAGCGTGTG TTCAGCCAGGTTATGAAGGCCGCGTACCTCGAACACCTGATGAGTTCGCTGCACGATGGA GGGCCTCGCCACAGCGAGCACAGCTTCTACAAGACATCAAGTGCTATAATGCAAAGTTCG CACTGGATGGTGAATACCTGGATAAGTTAAAGCAATCTCGGCGAGCTCAGCAAGCCAAGG CTCAGCGTGTATCATACCCTACACTCTTTCCTACGTTCAACAGGTGGAACGTGCCTGTG GCGCGGGTATCAACGATTGAAGGCTGACCCAGCGTCACAATCTTCTGTATTTCGGAAAT ACTATCATATCTCTTGTATCGCCAGTATATTCTACAACCTCAAGGCTGACACCAGTACCT TTTTTCAGCGCGGTGCTCTTCTCTTTGCTGTTCTTATGAACGCCCTTGGTTGCGGCCTT GAAATGCTGACTCTATACGCACAACGAGGGATAATAGAGAAGCACTCCCAGATACGCTCTC TATACCCATCTGCTGAAGCGTTTTTCATCAATGATAATGGATTTGCCTTACAAGATCATCA ACGCCATTACATCTAACATAGTTCTGTACTTCATGACCAATTTAAGGAGAGAACCCGGTGC TTTCTTCTTTGTCTTACCTCGTTCGTCCTCACTCTCACTATGTCCATGTTCTTCCGGTCT ATGGCATCGCTGTCAAGATCCCTTGCCAAGCTCTGCCCTTCTCCGCCGTTCTACTTCTCG GTCTCAGCATGTATACTGGGTTCACTATCCCAACTGGGTATATGCTTGGATGGGCTCGCTG GATTGCTTACATCAATCCAATCAGCTATGGCTTTGAGTCACTCCTGATTAATGAGTTCAC AACCGCGACTTCCCGTGCATGAACTATGTCCATCTGGTCTGGCTATACGGATCTCGGGC TTAACAACCGTGTTTGTCCACAGTCGGATCAGTGCCTGGACAAGCCTTTGTCAATGGCGA CGCCTACATTGAGTCAGCATATATCTATAACCGCTCGCACAAATGGAGAAACATCGGTGT CATATTCGCTACATGTTCTGCTTGCGGCCGTCTATCTCGTTGCTACTGACTTCATCACTG AGAAGAAGTCGAAGGGCGAGATCCTAGTTTTTCTCGCGACACGAAGCTCTGAAGAAAG GCAAGTCAGATGAGGATCTTGAAGAAGGTAGTGGCCGCAGCGTCACGGTGGAGAAGACT GGCTCAGATGGCCTTACCATGATTGAACGCCAGACCGCGATCTTCCAGTGGAAGGATGTC TGCTTTGATATTAAGATTGGAAGGAGAATCGCAGGATTCTTGACCACGTTGACGGATGG GTCAAACCGGGAACCTTGACGGCGCTTATGGGTGTTTCTGGTGCTGGAAAGACCACGCTC TTGGATGTCTAGCTACGCGCACCTCTGTGGGATTATCAGCGGAGAAATTCTCGTGCATG GTCAACCGCGGGATGACTCCTTTCAACGTAAGACCGGCTATGCCAGCAACAAGATCTGC ATTTGAGTACTGCTACAGTGCAGGACTTGGGACTTCTGCTCTCCTACGCCAGTCCGC TCACGTTCTCGTCAAGAGAAGATTGACTACGTGACAGAAGTGATTAAGCTTCTTGACATG ACTGAGTATGCTGATGCTGTTATTGGTGTGCCTGGTGAAGGCCTCAATGTTGAGCAACGTA AACGTCTACAATCGGGGTAGAGCTTGCGGCCAGACCCCAACTTCTCCTTTTCTGGACGA ACCGACCTCAGGGCTTGATTCACAGACATCCTGGGCTATTCTTGATCTCCTTGATAAACTG AAGAAGAACGGCCAGGCTATTTTGTGTACCATCCATCAACCGTCTGCCATGCTGTTCCAGC GCTTTGATCGTCTCTCTTCTTCAAGCTGGTGGTTCGCACCGTCTACTTTGGAGAAGTCGG CGAGAACTCGCAAATACTGATCGACTACTTCGTCCGCAACGGTGGTCTCCTCATGCTCCA GCCGCAATCCCGCCGAATGGATGCTCGACGTGATCGGTGCCGCTCCTGGATCTCACACG

AACATCAACTGGTTTCGAGACCTGGCGTAAATCCCCGAATATGCACGAGTCCAAGAGCAC  
CTTGCTGAACTCAAACGCGAACGTCCCGAACAAACCAACCTATTCCGCACCACATCCAGC  
CAAAAGCGCGAAGACAAAGCCAGCTACCGCGAATTCGCTGCTCCTTTCTGCGCCCAGCTC  
TGCAGGTCCAAGTACGCGTCTTCCAGCAAATCTGGCGGTCACCCACCTACATCTACTCCA  
AGACCGCTCTCTGCGTGCTGTCCGCTCTTTCGTCGGCTTCTCGCTCTTCCACACACCCAAC  
ACAATCCAAGGCTCCAGAATCAAATGTTTCGGCATCTTCATGCTACTTACCGTCTTCGGCC  
AACTCATCCAACAAATCATGCCGATTTTCGTCGCCAGCGCGCTCTATACGAAGTCCGTGA  
ACGACCCGCAAAGACCTACTCCTGGAAAGCCTTCATCATCTCCAACATCGTTGTTGAACTC  
CCCTGAACTCGCTCATGTCCGTCTTATGTTCTGTGCTGGTACTACCCAATTGGTCTTTA  
CCGCAACGCCGAACCAACAGATGCGGTGAGCTTGCAGGGGCACACAAATGTGGCTGATGGT  
CTGGACCTTCTTCTTCTCGTCCACCTTTGCACATTTTATGATCGCGGGCTTCGACGCCG  
CCGAGAACGCTGGAAACCTAGGTAATCTGCTCTTCTGCTTTGTTTGATTTTCTGCGGTGT  
CTGGCGACACCAGGTCAGCTCCAGGGTCTGGATCTTCATGTATCGCGTTTCGCCGTTTA  
CGTACCTGGTCAGCGGGATGTTGTCTGTGGGCATATCGAATACGAACGCAACCTGTGCAG  
ATAATGAGTATCTGCGCTTGACCCAGTCAATGGGACTTGCAGGCAAGTACATGGATTCATA  
TATTTTGAATATGGGTGGGTATCTTGAAGATGAAATGGCGACTTCTGACTGCAGCTTCTGC  
CCGATCAAGGAGACGAATGTGTTCTTAGTAGTGTTCATCAAGTTACTCGGAAATCTGGA  
GGAATTTTGGGCTCATGTGGGTATTTATTGTTTTTAATATCTTTCAGCTTGTGTTGTAC  
TGGTGGGTCCGTGTCCCAAGAGTCAAGAAGCCAGTCGCTAAGACCGAGTGA

>TP<sub>CH</sub> from *Cochliobolus heterostrophus* (NCBI Reference Sequence: XM\_014229532,4482bp)

ATGCCCTCAGACGCATCCTTGCACAATCAAAGTCATCACACGGACTCCCTTACTAACAACG  
ATAGTATCGCATCCACCGAGCAGAGGGAAAAGGAGGTCCACCAGCTAGCCAGGAAGTAC  
ACCCAGAACAGCGTATATTCTACTACGAGCCAGAATCCCTTCGCGGCTGAGCCGGGTAGT  
AAGTTAGATCCGAACGGTGGCAACTTTTCCGCTAGAGCCTGGGCTAAGGCGATGCTGCAA  
ACCCATACGGACGACAATCAAGCACATCCTCTTAGGACACTGGGCGTCTCCTTTTCTAACC  
TAAATGTTTATGGGTTTGGGTTTGACACTGATTACCAAAGTCTGTCCGCAATATTTGGCT  
GGAAGCCGTAGGGCTAGTGAGGAAGCTGATGGGCCAGAGAGAGAGGAAAATAGAAATTC  
TAAGAGACCTGGAAGGGCTAGTAGAGGCAGGGGAAATGCTTGTAGTTTTAGGCCCCCTG  
GCGCAGGATGCTCAACCTTCTGAAGACCTTGACTGGTCAGACGCACGGCTTCTACGTTGA  
CGATAAGTCCAATCTAAACTATCAGGGCGTTACGCCGAAGCAGTTGATAAAGAACTTTCG  
TGGCGAGGCTATTTACACAGCAGAGGTGGACGTACACTTTCCTAATATAACTGTAGGCGA  
TACGTTATTTTTTCGAGCAAGAGCGCGTGCACCCAGACATATTCCTGGGGGGGCAACCATT  
GATCAATACGCTGAGCACATGAGGGACGTAATAATGGCGTCCTTTGGAATTTACACACT  
AAAATACTATAGTTGAAACGATTTTATTCGTGGCGTTTCCGGGGGAGAGAGAAAAAGG  
GTGAGCATTAGCGAGGCTTGTCTTCTCAAGCCCCTTCAATGTTGGGATAATAGCACTC  
GTGGACTAGATTCTGCGAATGCAATAGAGTTCTGCAAAAACGTTAAGAATGCAAACGGAGA  
TTAATGGGGCGACCGCATGCGTAGCAATTTATCAGGCACCACAGGCCGCATACGACTACT  
TTGACAAAGTCTTAGTATTGTACAAAGGGAGGCAAATTTATTTTCGGCCCTACAGCCCAGG  
CGAAACAGTATTTCTTGAACATGGGTTTCGTATGTCCAGATCGTCAAACAGACGCCGACTT

TTTGACCTCCATGACGTCCCATTTGGAAAGGGTTGTCCAACCGGGCTACGAGAACCAAGTT  
CCGAGGACCCCTGATGAATTTGCAGCAAGATGGAAGGCGTCCCGTGAGAGGGCGGAGCTT  
CTAAATCAGATTGAGATGTACAATTCAAAGTACGCCACAGGGGGAGAGCATTGGAACGT  
TTTAAGGAGAGCAGGAGAGCACAGCAAGCCAAAGCCAAAGGGTTCAGTTCCCCTTACACC  
TTGTCTTATACGCAGCAAATAAAGTTATGTCTTTGGCGTAGCTGGGTGAGATTGAAGGGA  
GATCCTAGTATCACAATTTCCAGTGCAATGGGTAACGCAATAATCGCTCTGATTATCTCTA  
GCATGTTCTTTAACCTAAAAGACGACACATCATCTTTCTTCCAGAGGGGGAGCCTGTTGTT  
TTTCGCGATCGTAATCAATGCGTTCTCTAGTGGATTAGAGATGTAAACTTTACGCGCAG  
AGGCCATCGTCGAAAAACATAGTAGGTTTCGCTTTGTACCACCCAAGTGCGGAGGCGATT  
GCTTCTATGCTTATGGACTTGCCGTACAAAACATTGAACGCCATAAGCAGCAACTTAATCC  
TGTATTTTATGACAAATCTTCGTAGGGAGCCCGGAACTTCTTTTTCTTTGTCTTTACATCT  
TTTGTTTTAAACATTGACTATGTCTATGTTCTTTAGATCAATTGCTAGTCTGACACGTTCTTT  
AGTCGAAGCCTTACCATTGCTGCTATCCTTATTACGGGCCTAACTATGTATACAGTTTC  
ACCATTCCCACCAGTTACATGCCTGGGTGGTCTAGGTGGATGGCTTACATCGACCCGATCG  
CGTATGGCTTTGAGTCAATCATGGTGAACGAGTTCAGTGGAAGGGAATTTTTGTGCGTAA  
ACTACGTTCTGCCGGGCCAGTTATAATGTGCGGAGGAAATAACAGGGTCTGCAGTACAG  
TGGGCTCCGTCCCCGGTCAGCCGTTTGTGCTTGGCGATGATTACATTAGATCAACCTATGG  
GTACGAGGCCTCTAGAAAGTGGCGTAATGTGGGGATAATTTTCGCATTTATGGTAATATTG  
TGCGCAATTTACCTTGTGGCTTCTGACTTTATTACGGAGAAAAAGAGCAAGGGAGAGATA  
TTGGTTTTTAGACGTGGACATAAGAACCTTGACAGGTCTACTGGTCAGGATGATGTGCAA  
GGAGGATCAGAGAGGACGACGACGGCCGCAAACACAAAAAGCGACGACATTGCTATCAT  
AGAGCAGCAGACGGCGATATTCCAGTGGAAGACATATGCTATGATATCCAGATACAGAA  
AGAGAGACGTAGAATTTTAGATCATGTTGATGGATGGGTCAAGCCTGGCACGTTAACCGC  
GCTGATGGGAGTTAGTGGTGCAGGGAAGACTACGCTACTAGACGTGCTTGCCTCCCGTAC  
CACAATGGGAGTTATTTCCGGTGAAATGCTAGTGGACGGGAAGGAAAGAGACGACTCATT  
CCAGAGGAAAACCTGGCTACGCCAGCAGCAGGATTTACATTTGTCCACTGCGACTGTGAG  
AGAAGCTCTTACTTTTTCAGCCCTTCTTCGTCAGCCGGCTCATATCCCGAGAGAAGAGAAA  
ATCGCATATGTCACAGAAGTTATCAAAGTTAGAGATGACTGAGTTCGCCGATGCCGTTG  
TTGGGATTCCCTGGGGAAGGTCTAAATGTAGAGCAGAGGAAGAGACTTACTATTGGGGTGG  
AACTTGCCGCCAGGCCAGCTCTGTTATTGTTTTGGACGAACCTACGTCAGGGCTTGATTC  
TCAGACCTCCTGGGCCATTTTAGACCTCCTGGACAAACTGAAAAAGAACGGTCAGGCAAT  
CTTGTGTACCATTACCAACCGAGTGCTATGCTTTTCCAAAGGTTTGATAGACTACTATTCT  
TAAAATCTGGCGGTCAGACCGTATACTACGGCGATGTTGGTGAGAACTCTAAAATATTGA  
TAGATTATTTTACCAGGAATGGAGGTCCCCCTGCCACCCGCAGCGAATCCGGCTGAATG  
GATGTTGGAAGTAATTGGAGCGGCGCCTGGTAGCCACACAGACATCGATTGGCATGACAC

CTGGAGGAAGTCACCGGAATACGCCTACGTCCAAGCACATTTGGCAGAACTAAAAGAAG  
AAAGATCACGTATGACCGACCTTAGTAGGACGGCCAGCAGACAGGCCACGATGCTGCGA  
GCTTCAGAGAGTTTCGCGGCCCCCTTTTGGGCCAGTTCTACGAGGTCCAGCTAAGGGTATT  
TCAGCAGTTATGGCGTACACCAACCTACATATATTCAAAGGCATTTCTGTGTGTTAGTACG  
TCTCTATATGTGGGTTTTTCTCTATATAACACACCGAACACGTTACAGGGGTACAGAACC  
AAATGTTTCGCTATATTTACGTTATTTTTCTGTTCGGCCAGTTCATTACAGCAAATAATGCCA  
CACTTTGTGGCTCAACGTGCGTTGTATGAGGGCAGAGAAAAGGCCAAGCAAACATACTCT  
TGGAAGGCCTTCATCATGAGTAACATTATTGTAGAGTTGCCTTGGAACACCCTGATGTCCG  
TTTTATTGTTCTTGTGTTGGTATTACCCAATCGGGCTTAGTCACAACGCCGAAGCAACTGA  
TAGCACGGCATTAAAGAGGTGCCCAAATGTGGTTGTTTGTATGGGTCTTCTTGATGTTTGA  
AGTACTTTTCGCACACTTTATGATCGCGGCGCTAGATACGGCAGAAAATGCCGGTAATATG  
GGTAACTTACTGTTACGTTGTGCGTTATCTTCTGTGGGATCTTAACCACGCCGGAGCAA  
TGCCCAGATTTTGGATCTTTATGTACAGAGTTTCTCCGTTTACATACCTGGTGGGGGGAT  
GATGGCGGTGGGAGTTGCCGATTCTTCCGTCACGTGCGCGGCAAATGAGTACTTACACTTC  
GACCCAGTTAACGGAACCTGCGGAGAGTACATGGCTCAGTATCAAGCGATGGCTGGCGGT  
TACGTTCAAACCCTTCCGCGACGAGCAATTGTGCGTTTTGTCCAATGGGCGATACGAATG  
TGTTCCATAAAGACAGTGCACGCGGAGTACTCAAACGTCTGGAGGAACTTCGGATTGATGT  
GGGTGTTTCGTCGTGTTTAATGCATTTGCTGCTTGTGGTTTATATTATTGGGCCAGAGTACCC  
AAGCGTCTACGATTGAAAAAGAGGCTGCCCAATTCGTGCAGAGGGTTCTCTTGATAGT  
GAAACGGTGGTTCGGACGTACTTCCGCGAGTCGAACAACAGGATGCTGAGAAAAGGGCCGC  
GTTCTAG

>TP<sub>CL</sub> from *Cochliobolus lunatus* (NCBI Reference Sequence:, bp)

ATGAGCCTAGTCGGCAATTTACCTCCAACCTTTGATCGGGAGGCTGTATCCGGCGGGCGCCC  
CATCACCAGAAATGATAGCCGAACAGCAACGCCAACACTACCAGGACGACGAGCGGGAC  
CACCAGGCTGCCGAGTCAGATGCGTCCACAATAGCAGCGGGCGAGGGCTCGCCGCCAGT  
CAGCACAACCGCGCTGACCACAAGAATGCCTCTCACAACACACGTGACGACGACGAAATC  
GCCGAGACCATGCGGAGAGAAGAGGCAGTCCACCAACTTGCCAGACGCCTGACTGCCCA  
GAGCCATCAATCTTCATCACAAGCAAACCCTTTCAACGCACCCCCTAATTCGGCTCTGGAT  
CCCAATGGCGAGCACTTCAACGCCCGTGCCTGGACAAAGGCTATGCTCAATCTGCAACTT  
CAAGACGAGAATGCACCACCGGTCCGAACCGCTGGTGTGCTTCCGCAACCTGAATGTC  
CATGGTTTTCGGTACCGACGCTGATTACCAGAAGAGCGTCGGCAACGTTTGGCTCGAAGGC  
CCCAGTCTCGTCAAGAAGCTCATGGGCGACAAGGGCCGCAAGATCAACATTCTGCGAGAC  
TGTGATGGTCTTGTGCGAGGCTGGTGAATGTTGGTTGTTCTAGGACCTCCTGGATCTGGTT  
GCTCAACCTTCTTGAAGACCATTACTGGCGAAACACACGGTTTTCTTTGTCGATCAGAACTC  
ACACATTAACCTACCAGGGTATCAGCCCAGAGATTATGAACAAGAACTACCGTGGAGAGGC

CATCTACACGGCCGAGGTCGACGTCCACTTCCCCATGATGACTGTCGGAGAAACCCTCTAC  
TTTGTGCTCAAGCTCGCCGCCCCAGGCACATCCCAGGCGGCGTCAGCGTACAACAATAC  
GCTGAACACCAGCGCGATGTCATCATGGCCTTGTACGGCATCTCCCACACTCTCAACTC  
GGGTCGGAAACGACTTCCCTCCGCGGTGTCTCTGGTGGAGAGCGAAAGCGTGTACCATCG  
CCGAAGCATCCCTTAGCAGAGCACCCCTGCAAGCCTGGGACAACCTCGACCAGAGGTCTCG  
ACTCTGCAAACGCCATCGAGTTCTGCAAACCCTCCGTATGGAGACTGAGATCAACGGCA  
GCACTGCATGTGTTGCCATTTACCAAGCACACAGGCAGCTTATGATCTTTTTGACAAGGC  
GCTTGTGTTTGTACGAGGGCCGCAAATCTTCTTTGGTAAGACGACAGACGCAAAGGCCTA  
CTTTGTCAACATGGGCTTCCATTGCCCTGACCGCAAACGGATGCCGATTTCTTAACCTCC  
ATGACCAGTCCGCTGGAGCGCATCGTGCCTGAAGGCTTCGAGGGCCGCGTTCCTCCGCACA  
CCTGACGAGTTCGCACAGCGCTGGCTAGATTCTCCTGAGCGAGCAGCGCTGCTTCGAGAC  
ATTGAAGCTTATGAGCAAAAATACCCCATTTGGTGGCGAGTCTAGCCAGAAATTCAAGGAG  
TCTCGCCAGCTTCAAAGGCCAAAGGGTCAGCGTGAGACATCGCCTTACACGCTCTCTTAC  
ATGGACCAGGTCAAGCTTTGCCTCTGGCGAGGCTTCGTCCGCTTAAAGGCCGATCCTAGTA  
TCACTCTCACCAACTCATCGCTAACTCCATCATGGCTCTTATCATCTCGTCCGTCTTCTAC  
AACCTCCAGCCTACGACATCAAGTTTCTACTCTCGATCCGCTCTGCTCTTCTTCGCTATCCT  
GATGAACGCCTTCGGTTCGCGCTTGAGATCTTGACGCTCTACGCCAACGTCCCATTGTT  
GAGAAGCACTCGCGCTACGCCTTGATCACCCATCTGCTGAGGCTTTTGCTAGTATGTTGA  
CGGATTTGCCTTACAAGATTGTAACGCCATTACGTTCAATTTGGTTTTGTACTTCATGACC  
AACCTGCGGAGAGAACCGGGCAATTTCTTCTTTTGTCTCATCTCCTTTACGCTTACGCT  
CGTCATGTCCATGTTCTTCCGATCCATTGCCGCTTTGTGCGGCTCCCTGGTACAGGCGTTGG  
CGCCTGCTGCCATTCTCATTCTCGGCCTCGTCATGTACACCGGTTTCGCCATTCTCCGAAC  
TACATGTTGGGATGGTCCAAGTGGATCCGCTACATCAACCCTGTCAGCTATGGATTTGAGG  
CCCTCATGGTCAATGAATTCCACAACAGGCGATTTGAGTGCAATGACTACATTCCTTCCAG  
CGGTGGTCTTCCAGCTCTCAGTGCCTATGACAACATCTCTGGTCCCCAACGAGCTTGCCGG  
GCTATCGGATCTGTTCTGACAGCCATATGTGCGAGGGCGACGCTTACATCAACTCGTCCT  
TCAATTACTACGCTTCGCACAAGTGGCGCAACTTTGGAATCATGTGGGCATTCATGTTCCG  
TCTCATGTTTGTCTACCTCGCTGGTACCGAATACATCACTGCCAAGAAGTCCAAGGGTGAG  
GTCCTTGTTTTCCGCCGCGGCCACAAGCTCCCCGCTCCCAAGAGCAAGTCACAAGAGGAC  
CTTGAAGCTGCTGACCCCGGACGCAACGTTGCTGTGCAAACGACAACCTCGGACAGCATT  
GCCATCATCGAACGCCAAACCGCCATCTTCCAGTGGGAGGACGTGTGCTACGACATCACG  
ATCAAGAAGGAGCCTCGCCGAATTCTCGACCACGTTGATGGATGGGTCAAGCCTGGTACT  
TTGACCGCGCTCATGGGCGTTTCTGGTGCCGGTAAAACAACGCTTTTGGACTGCTTGGCTA  
CACGTACAACCATGGGTGTGATTACAGGTCAGATGCTGGTTGATGGCAAACCTCGCGATG  
AATCTTCCAGCGTAAGACAGGTTACGCTCAACAACAGGATCTCCATCTGTCAACCTCGAC



CGTTCGCGAAGCCCTCATTCTCTGCTGTCCTACGTCAACCTGCACACGTCTCTCGCCAA  
GAGAAGCTCGAATATGTGCAAGAAGTTATCAAGCTTCTGGAAATGACCGAGTACGCTGAT  
GCCGTCGTTGGTGTACCTGGCGAAGGTCTTAATGTGCGAGCAACGAAAGCGTCTTACTATCG  
GTGTGGAGTTGGCTGCTAAGCCTGCGCTCCTTCTTCTTGGATGAACCTACCTCTGGACTT  
GACTCTCAAACCTCTTGGGCTATCCTGGATCTTCTCGACAAGCTGAAGAAGAACGGCCAG  
GCTATTCTCTGCACTATCCACCAGCCCAGTGCCATGTTGTTCCAGCGCTTCGACCGTCTTCT  
GTTCTTGGCCCGTGGTGGACGTACTGTCTACTATGGAGATATCGGTGAAAACCTCGAAACT  
CTTGTCAACTACTTTGTTTCGCAACGGCGGCCCTCCATGCCACCTGATGCCAATCCCGCTG  
AATGGATGTTGGAAGTCATCGGTGCTGCTCCTGGCTCGCATACTGATATTGACTGGCATCA  
GACTTGGCGACAGTCCCCTGAGTATACCGAGGTCAAGCGCCATCTTGCTGAACTCAAGTC  
CGAACGTGGCCAGGCTGAGGCTCTTCAGCGTACCCTGTCTGCTCAGAAGCGGGAGGACAA  
GGCTGCATACCGCGAGTTTGCCGCGCCATTTGCCGTCCAGCTCCGCGAGACCTTGTTTCGT  
GTCTTCCAACAATACTGGCGCACTCCTTCGTACATCTACTCCAAGACTTTCCTCTGTGTTCT  
TTCGGCCCTCTTCATCGGTTTCTCGCTCTTCCAGATGCCCAACACCCAGACTGGGCTCCAG  
AACCAGATGTTTGGTATCTTCATGTTGTTGACCATCTTCGGTCAGTTGGTCCAACAGATCA  
TGCCGCACTTTGTCACCCAGCGTGCCTTGTACGAGGTTTCGTGAGCGACCCAGCAAGGCCTA  
TTCCTGGAAGGCATTTCATGATTGCCAACATCGTCGTCGAACTTCCCTGGAACCTCCCTGATG  
GCTGTGCTCATTTTCTTCTGCTGGTACTACCCGATTGGTCTCTACAAGAATGCCGAGTACA  
CCGATGCCGTCACCCTCCGCGGTTTCCAGTTGTTCCCTCTTTGTCTGGATGTTCCCTGCTCTT  
ACCTCGACCTTCACGCACATGGTTATTGCTGGTATGGACCACGCCGAGACTGGTGGCAAT  
GTGGCCAACTTGATGTTCTCGCTCTGCCTGATTTTCTGCGGTGTCCTCGCCCAGCCTTCCCA  
GTTCCCCCGCTTCTGGATCTTCATGTACCGTGTCTCACCGTTTACGTACATGGTGTCCGGTA  
TGTTGTCCGCTGGTCTTGCCAACAGTCAGGTGAACTGCGCTCCAAACGAGCTCATTCAATTT  
CGACCCATCCCAGGGCCAGACTTGCGGCGAATACATCAAGCCTTGGATTTTCGGTCTCTGGT  
GGCAAGATGCTGAACCCGGATGCTACAAGTGATTGCAACTTCTGTGCTATCCAGGATACC  
AATGTCTTCTCTCAAGCATCTCATCCTCTACTCCGACCTTTGGCGTAACTTTGGAATCCT  
CTGGGTCTATGTCATCTTCAACATCGCTGCCGCGCTCGCCTTGTACTATCTTATCCGTATGC  
CCAAGCCCAAGAAGGAGGAGACAAAGGAAGCTAGCCCGGCTACTGCAGCCAGTGCGACA  
ACGGCCGGTGAGCCTTCCCGTGTGGCAGCAGCCACAACCTCGGATTCCGGCCGCAAGGT  
GAGAAGGATGGCGAGACTGCTCGCTACGCTTCCATCACTGGTGCCAGCACACCACCACAA  
CAACCTACAGAAATATCGGAGAAGGTATAA

>*TPEV from Emericella variicolor* (NCBI Reference Sequence: A0A1V1GB10.1,4465bp)

ATGAGCGCGGCGGGCAAGTTTGGGCCCAATGGCGACCGAGAGCTCGAAAGGGCAGAGGA  
CAGCATCTCCAGCCTAGATGCGAGGGAAGCAGAGGTCCACAAGCTGGCCAGACAGTTCAC  
GGAGCAGAGCAATCAATCCATCGCTGCGCTGAATCCCTTTGCTGCGGAGCCTGAATCCAA  
GCTGGACCCCAATGGTGACAACCTCAATGCCCGCGCGTGGTGCAAGGCCATGCTCCAGAT

GTGCACTGAAGACAGCCAAGCACATCCACTCAGGACTCTGGGTGTGGCCTTCAGCAACCT  
GAATGTGCACGGGTTTCGGTTCGGATACTGATTTTCAGAAGAGCGTGGGCAACGTCTGGCT  
AGAGGCTGTCGGTCTGGCAAGGAGGCTCATGGGTTCGACAGCAGCGCAAGATCGATATTCT  
GCAGAACTTGGACGGATTGGTCGAGGCAGGAGAGATGCTGGTTCGTCCTTGGACCACCTGG  
CTCAGGATGTACGACTTCTTGAAGACCATCGCTGGAGAGACATACGGCTTCCACGTCTGA  
CAAGAACTCGGGCCTCAATTACCAAGGCGTGAGCGCAAAGCAAATGGCCAGCGCCTTCAG  
GGGAGAAGCCATCTATAACCGCTGAGGTTCGACGTCCATTTCCCAAAGCTCACGGTGGGCGA  
TACCCTCTTCTTCGCTGCCCGGGCCCGCGCACCCGCGATATATCCCGGAGGAGCAACAGTG  
AACCAGTACGCCGCCATATGCGAGACGTCATCATGGCAATGTTTCGGTATCTCCACACC  
AAGAACACTATCGTGGGAAATGAATTCATCCGCGGTGTCTCTGGTGGAGAGCGTAAGCGA  
GTCAGTATTGCTGAAGCCTGTCTGAGCATGGCTCCGCTGCAATGTTGGGATAACTCCACTC  
GTGGTCTCGACAGTGCTAATGCCATCGAATTCTGCAAGATCCTTCGCATGCAGACGGACAT  
AAATGGCACCCTGCCTGCGTTTCACTTACCAGGCTCCTCAGGCTGCCTACGATCAATTC  
GACAAAGTCCTGGTCTGTACGAGGGTCGCCAGATTTCTTTGGTTCGCACGGCCGCGGCTA  
AGAAGTACTTTATTGACATGGGTTTCATCTGTCTGATCGCCAAACAGATGCTGATTTCT  
CACCTCTATGACTAGCCCCCTCGAGCGGGTCGTGCAGCCAGGTCGTGAAAGCTACGTTCCC  
CGGACGCCCGATGAATTCGCCGCAAGGTGGAAGGCCTCGCCAGAGCGAGCGCAGCTTCTG  
CGAGACATTGAGGTCTACAACGCAAAGTTGTTCTCGGTGGTGAATCCCTGGACAAGTTC  
AAGCAATCCCGCAGGGCTCAGCAAGCCAAGGTCCAGCGTGTATCATCGCCCTACACTCTT  
TCATATGTTTCAGCAGGTTGAGTTGTGTTTATGGCGCGGATACAAACGATTAAAGGCAGAT  
CCCAGTGTACAACTCTTCTCTAATCGGAAATTCGATCATGGCCCTCGTCATCGCCAGTA  
TATTTTACAACCTTCAGCCTGACACCAACAGCTTCTTTCAGCGCAGTGCTCTCCTATTTTTT  
TCTGTTCTCATGAATGCTTTTCGGTTGTGGTCTTGAAATGCTCACGTTTATGCTCAACGAGG  
GATCGTGGAGAAACACTCTCGATATGCCCTCTACCACCCATCTGCTGAAGCATTTCGCATCA  
ATGCTGATGGATTTGCCCTACAAAGTCCTTAATGCCATCATTACAACTGATTCTCTACTT  
CATGACAAACCTAAGGCGAGAACCTGGGGCCTTCTTCTTCTCCTGTTCACTTCTTCATT  
TGACTCTAACCATGTCCATGTTCTTCCGGTCCATTGCATCGCTGACAAGAACTCTTGTTCA  
AGCCCTGCCATTTGCTGCGATTCTGATCCTGTCTCTGAGCATGTACTGTTTTGCAATCC  
CAAGACAGTACATGTTAGGATGGGCCCCGTTGGATTTCCCGTATCAACCCTATCAGCTACGG  
CTTTGAGTCTCTGATGATCAATGAGTTCATAAACC GCGAGTTCAAATGTCTCAACTACGTC  
CCGTCAGGCCCTGGCTACGCGGGTCTCAGCTCGAGCAACCATGTTGCTCCACAGTCGGA  
GCTGTACCGGGACAGCCCTATGTTAATGGCGACAACCTACATTGAGTCATCTTATGACTATC  
ACGCCTCGCACAAGTGGAGGAACATCGGCATTATATTTGCCTTTATGTTTCATCTCATGTT  
GGTTTATCTGGCTGCTACCGAGATCGTCACCGAAAAGAAATCGAAGGGCGAGATTCTAGT  
CTTCCGTCGCGGACATGAAGCCCTGAAGAAGGACAAGTCAAAGAAGGATGTCTGAAGGCG

GTAGTGACCGCAGCATTGCCGTGGAGAAGAAGATCCGATCAGATAGCCTTGCCATCATCG  
AACGCCAGACTGCTATTGTCCAGTGGAAAGACGTTTGCTATGATATCAAGATTGGAAAGG  
AGAATCGCAGAATTCTTGATCGTGTTGATGGATGGGTGAAACCGGGTACCTTAACCGCGC  
TTATGGGCGTCTCTGGTGTGGAAAAACCACGCTATTAGATGTCCTGGCTACTCGTACCAC  
TGTGGGTATTATCACGGGAGATATACTTGTGATGGCAAGCCTCGGGATGCGTCCTTCCAG  
CGCAAGACTGGCTACGCTCAACAACAAGATTTGCATTTAAATACTTCTACTGTTGCGGAGG  
CCCTAACCTTCTCTGCTCTTCTACGTCAGCCCGCTCATATTCCTCGGCAAGAGAAGATTGA  
CTATGTCACCGAAGTTATTAAACTCCTAGACATGACTGAATATGCTGATGCCATCATTGGG  
GTACCTGGGGAAGGCCTTAATGTTGAGCAACGCAAACGTCTCACTATCGGTGTGGAGCTT  
GCTGCCAGACCGGCTCTACTTCTTCTTAGATGAACCTACCTCTGGACTTGATTCTCAGA  
CATCATGGGCTATCCTTGATCTTCTCGATAAATTGAAGAAGAATGGACAGGCTATTTTGTG  
CACTATCCATCAACCTTCTGCAATGCTGTTCCAGCGCTTCGATCGTCTCCTCTTCCTCAGG  
CTGGAGGTCGCACTGTGTACTTTGGTGAAGTCGGTGAAAACCTCACACATCCTTATTGACTA  
CTTCGTCCGAAATGGCGGCGCCCCGTGCCCTCCTGATGCTAATCCTGCCGAATGGATGCTC  
GATGTCATTGGTGCCGCTCCCGGATCCCATACTGACATCGACTGGTTTGACACATGGCGCA  
AATCCCCCGAGTATGCTCGTGTCCAAGAGCATCTCGCCGAACTGAAGCATGAACGCTCTC  
AACTTGCCCGCACCAACTTGGACCAGAACCACGAGGACAAGGCCAGCTACCGCGAATTCG  
CCGCTCCCTTCTATGAACAGCTCCGCGAAGTCCAGCTCCGAGTGTTCCAGCAAATCTGGCG  
CTCCCCACATACATCTATTCCAAGACCTTACTGTGTGTTAGCTCAGCTCTCTTCGTTGGAT  
TCTCTCTGTTTCGTACGCCAATACGATTCAGGGGCTTCAGAACCAAATGTTTGCTATCTTT  
ATGTTGTTGACTCTATTTGGTCAGCTCATCCAGCAAATCATGCCACATTTTGTGCTCAGCG  
CGATTTGTATGAGGCTCGCGAACGTCCATCCAAAGCTTACTCTTGAAAGCTTTCATCATA  
TCTAATATCATTGTTGAACTGCCTTGGAACTCGTTATGTCGGTCCTGATGTTCTATGCTG  
GTACTACCCAGTGGGTTTATAACCGCAATGCTGAGCCTACTGACGCTGTCGCGCTCCGTGGT  
GCGCAAATGTGGCTTTTCATCTGGACCTTCCTCCTCTTCTCATCCACTTTTGCACACTTTAT  
GATCGCAGCTTTTGAGAGTGCCGAGAATGCTGGTAATACGGGTAATTTGCTCTTCATACTT  
TGTCTGCTGTTCTGCGGTGTCCTGGCCACACCTAAGCAATTTCCCGGGTCTGGATCTTCAT  
GTACAGGGCTTCGCCATTCACGTACCTTGTGAGCGGTATGCTCTCTGTCGGCATCTCCAAC  
ACAAAAGTCTCATGCGCAGCGAATGAATACTTGCACCTTGACCCGCTCAATGGTACCTGC  
AGCGACTACATGAAAGCATATCAATCTACGATGGGCGGCTATATTCAAGATGGTAGCGCG  
ACCTCAGACTGCAGCTACTGCCCCATTAGCGACACGAATGTGTACCTTACTTCCGTCTCAT  
CCCATTACTCAGACGTATGGCGAACTTTGGCATTATGTGGGTCTACATCGTCTTCAATAT  
ATTTGCGGCGTGTTTGCTGTACTGGTGGGTGCGTGTGCCGAAGGTTAAGGCTCCCAAGAAC  
AACGTCTGAGATCGCAACTGATATTATCATACCTTTGCCTCGAATTGGGTTTCGTGATTGGT  
AGCCGCAGGATTTCTTTATATAAGATTTAG

>TP<sub>MF</sub> from *Neosartorya fumigata* (NCBI Reference Sequence: XM\_747710,4494bp)

ATGTCTTTCTAGGGACGATAAATCCTAACATCAACCCAGAGCGAACAGTAGCAGGTCCG  
GAACTCAGGAGGAGGAAGGAGAAATCGCCAGGGTCAACACAATCACCATAACAATGC  
CGCCAGCGTCAGCACGGACGAAACCGTTTTGGAACGGTCAAAGGAAATCGGGCATGAGG  
ATGTCGCAGTGGAAGAAGTGACCCGCTGGCACGCCAATTGACCCGTCATCAACTAGAT  
TTTCAACCAGTGGTAATGTCGAGAATCCATTTCTCGAAACCAAGGAGGATTCGACGCTGA  
ATCCTCTCAGCCCCAATTTCAAAGCTAAGAAGTGGATGAAGAATCTGCTCGCCCTTTCATC  
CCGGGATCCTGAACGGTATCCCAAGCGTGTGGCGGGTGTGCTTTCAAAAATCTCAGTGTC  
CATGGATATGGTAGCCCGACCGATTATCAGAAGGATGTGTTCAACTCGGTCTTGGAAGTT  
GGTACTCTTGTCCGCCGGATCATGGGTACTGGCAAGCAGAAGATCCAAATCCTGCGGGAT  
TTCGATGGCCTTGTCAAGAGCGGCGAAATGCTGGTTCGTTCTGGGCCGTCTGGAAGCGGG  
TGCTCGACTTTCCTCAAGACCATCTCCGGCGAAATGAACGGTATCTACATGGATGAGAAG  
TCGTACTIONTGAACATCAGGGTATCTCGTCCAAGCAGATGCGCAAGCAGTTCCGCGGGCAG  
GCTATCTACACTGCTGAAACGGATGTGCATTTCCCGCAATTGACAGTGGGTGACACTCTTA  
AATTCGCTGCGCTTGCTCGTGCTCCTCGGAATCGTCTGCCCGGTGTCTCCAGAGAACAGTA  
TGCCGTGCACATGCGCGATGTGGTGATGGCCATGCTTGGCCTCACACACACCATGAACAC  
CAGAGTCGGCAACGATTTTCGTCCGCGGTGTCAGTGGTGGTGAGCGTAAGCGTGTGAGTAT  
CGCTGAGGCCACGCTCAGTGGCAGCCCTCTGCAGTGCTGGGACAACAGCACCCGTGGTCT  
GGACAGCGCGAACGCGCTCGAATTCTGCAAGACTCTGAACCTGATGACCAAGTACGCCGG  
CGCTACCGTTGCCGTGGCTATTTACCAAGCCTCCAGAGTGCGTACGATGTATTCGACAAA  
GTGACTGTTCTGTACGAAGGAAGACAGATCTACTTTGGACGCACCGACGAAGCCAAGGAA  
TTCTTTACCAACATGGGATTTGAATGTCCGGAACGTCAGACAACCGCTGATTTCTTGACTT  
CTCTCACCAGTCTGCCGAGCGTGTGGTGAAGCCCGGTTTGAGGGCAAGGTCCCGCAGA  
CCCCTGACGAATTTGTGCGAGCTTGAAGAGCAGCGAAGCCTACGCCAAGTTGATGAGAG  
AAATCGAAGAGTACGATCGGGAGTTCCCAATTGGTGGCGAGTCGCTCAACCAGTTTATCG  
AGTCTCGCAGAGCCATGCAGGCGAAGAACCAGCGAGTCAAATCCCCCTACACCATTTCCG  
TATGGCAGCAGATCGAGCTGTGCATGATCCGGGGCTTCCAACGTCTCAAGGGCGATTCCA  
GTTTGACCATGTCCCAGTTGATTGGTAACTTTATTATGGCCTTGGTTATCGGAAGTGTTTTC  
TACAACCTGCCGGACGACACAAGCAGTTTCTACGCTCGTGGTGCTTTGCTTTTCTTTGCCG  
TGCTGCTCAACGCCTTTTCCAGTGCCCTCGAGATTTTGACACTCTATGCTCAACGTCCCATC  
GTTGAGAAGCAAGCTCGCTACGCAATGTATCACCCCTTCGCTGAAGCTATAGCCTCGATGC  
TCTGTGACATGCCTTATAAGATCACCAACGCCATCATCTTCAATCTTACACTCTACTTCATG  
ACGAATCTTCGCCGCGAACCGGGCGCCTTTTTTGTCTTCTTGCTCTTCTTTTCGTCACCAC  
ATTAACCATGTCCATGCTTTTCCGTACGATGGCCGCTTCGTCCCGGACCCTGTCCCAGGCC  
CTGGTGCCCGCCGCTATCCTCATTTTGGGTCTTGTGATCTATAACCGGCTTACGATTCCGAC  
CCGCAATATGCTAGGCTGGTCGCGTTGGATGAACTATATCGATCCCATCGCATAACGGATT

GAGAGTTTGTATGGTTAACGAATTCACAACCGGCAGTTCTTGTGTCCAGACTCTGCATTTG  
TCCCCTCGAGCGGTGCATACGACAGCCAGCCCTTGGCTTATCGGGTCTGCTCGACAGTGGG  
CTCAGTTTCTGGCTCTCGTTACGTCCAAGGCGACGACTACCTCAACCAGAGCTTCCAGTAC  
TATAAGAGCCACCAGTGGAGGAACCTGGGTATCATGTTTGGTTTCATGTTCTTTCATGT  
TCACCTACTTGACTGCCACCGAGTACATCTCGGAATCGAAGTCTAAGGGTGAAGTGCTACT  
GTTCCGACGAGGCCACGCACAGCCCACCGGCTCCCATGACGTTGAGAAGAGCCCTGAGGT  
GTCTTCCGCTGCGAAGACGGACGAGGCCAGTAGTAAAGAGGCTACCGGAGCTATACAGA  
GACAAGAGGCAATCTTTCAATGGAAGGATGTGTGCTACGATATCAAGATCAAGGGTGAAC  
CACGGCGTATTCTTGATCACGTGACGGCTGGGTCAAGCCTGGTACTTGTACTGCTCTCAT  
GGGTGTCTCCGGTGTGGTAAGACGACACTTCTGGATGTGCTCGCGACCCGTGTGACCATG  
GGTGTGTCAGTGGTGAAATGTTGGTTGATGGTCGCCACGGGATCAGTCTTCCAGCGCA  
AGACGGGCTATGTCCAGCAACAGGATCTTCATCTCCATACCAGACTGTCAGAGAAGCGC  
TACGCTTCAGTGCTTTACTCCGCCAGCCTGCTCATGTTCCCGCCAGGAGAAGATTGACTA  
TGTTGAAGAGGTTATCAAGCTGCTTGGCATGGAATCCTACGCCGATGCAGTCGTTGGTGTT  
CCTGGAGAAGGTCTCAATGTGCAACAACGGAAGCGTCTTACAATTGGAGTGGAACTAGCA  
GCGAAGCCTCAACTCCTCCTGTTCCCTGGATGAGCCTACGTCTGGCCTCGACAGTCAAATT  
CCTGGTCCATTCTCGATCTGATCGACACTTTACCAAGCACGGCCAAGCGATTCTGTGTAC  
GATTCACCAGCCATCGGCAATGCTGTTCCAACGATTCGACCGCCTGCTATTTCTTGCCAAA  
GGAGGCAAGACTGTCTACTTTGGGGAAATCGGGGAGAAGTCGTCTACTCTTGCTAGCTAC  
TTCGAGAGAAATGGCGCTCCTAAGCTTCTCCCGACGCAAACCCCGCCGAATGGATGCTC  
GAGGTGATCGGTGCCGCTCCTGGTTCGCATAGCGACATCGACTGGCCTGCTGTCTGGCGG  
GACAGCCCCGAACGCAGAGCGGTGCATGAGCACCTTGATGAATTGAAAAGGACCCTTTCG  
CAGAAGCCCATTGACCCGTCAAAGGCCGATCCCGGCAGTTACGACGAGTTCGCTGCCCCC  
TTCACCATTAGTTGTGGGAATGTCTGCTTCGTGTCTTCTCGCAATACTGGCGGACCCCGG  
TGACATCTACTCCAAGACCGCACTCTGCGTTCTCACCGCTCTATACATCGGATTCTCCTTC  
TTCAACGCTCAGAACAGTGCCCAGGGTCTCCAAAACCAGATGTTTCAGTATTTTCATGCTGA  
TGACTATCTTCGGTAACCTGGTCCAACAGATCATGCCCAATTTCTGCACTCAACGGTCTTT  
GTATGAAGTCCGCGAAAGGCCTTCCAAGACCTACTCTTGGAAGGCATTCATGGCAGCCAA  
TATCATTGTTGAGCTTCCCTGGAATACTTATGGCTTTCCTGATCTTCGTCTGCTGGTACT  
ACCCGATTGGGCTGTACCGGAACGCCGAACCGACTCCGTCCACGAACGCGGAGCAC  
TCATGTTCCCTCCTTATCTGGTCATTCCTTCTTTCACCTCCACCTTTCGCGACATGATGATC  
GCCGGTATCGAACTCGCCGAGACCGGAGGTAACCTTGCCAACCTCCTTTTCTCCCTCTGCT  
TGATCTTCTGTGGTGTCTTGGCCACCTCAGTCCCTCCCGGCTTCTGGATTTTCATGTAC  
CGCGTCTCGCCGTTACATACCTTGTATCAGCCATGCTGTGACCGGCGTATCAGGCACAA  
ACGCCGTCTGCGAGCCTGTGAGTTCCTGCACTTCGACCCCCAAGCAACATGACCTGCAA

GGATTACATGGCCGACTACATCTCCACAAGGGGCGGCTATCTGGAGAACCCATCCGCAAC  
CAGCGACTGCACCTTCTGCACCATCTCCAGCACGGATACCTTCCTCAGTGCCGTCAGCAGC  
CACTACAGTGACGCCTGGCGTAACTTTGGCATCATGTGGGCTTACATCATCTTTAACATCT  
TCGCTGCCGTTTTTCATTTACTGGCTTGCTCGCGTGCCCAAGGGCAAGAGAACCAAGGGTTC  
GACGTGA

>TP<sub>sc</sub> from *Saccharomyces cerevisiae* (NCBI Reference Sequence: DQ332357.1,4536bp)

ATGCCCCGAGGCCAAGCTTAAACAATAACGTCAACGACGTTACTAGCTACTCCTCCGCGTCTT  
CTTCTACTGAAAACGCTGCTGATCTACACAATTATAATGGGTTCGATGAGCATAACAGAAG  
CTCGAATCCAAAACTGGCAAGGACTCTGACCGCACAGAGTATGCAAACTCCACTCAAT  
CGGCACCCAACAAAAGTGATGCTCAGTCTATATTTTCTAGCGGTGTGGAAGGTGTAAACC  
CGATATTCTCTGATCCTGAAGCTCCAGGCTATGACCCAAAATTGGACCCCAACTCCGAAA  
ATTTTTCTAGTGCCGCTGGGTAAAGAATATGGCTCACCTAAGTGCGGCAGACCCTGACTT  
TTATAAGCCTTATTCCTTAGGTTGCGCTTGGAAGAACTTAAGTGCTTCTGGTGCTTCCGCA  
GATGTGCGCTATCAGTCAACTGTGGTTAATATTCCATACAAAATCCTAAAAAGTGGGCTGA  
GAAAGTTTCAACGTTCTAAAGAAACCAATACTTTCCAAATCTTGAAACCAATGGATGGTT  
GCCTAAACCCAGGTGAATTGCTAGTCGTTTTAGGTAGACCAGGCTCTGGCTGTACTACTTT  
ATTTAAATCCATCTCTTCAAATACTCATGGTTTTGATCTTGGTGCAGATACTAAAATTTCTT  
ACAGCGGCTACTCAGGTGATGATATTAAGAAACATTTTCGTGGTGAAGTTGTTACAACGC  
AGAAGCTGATGTACATCTGCCTCATTTAACAGTCTTCGAACTTTGGTTACAGTAGCGAGG  
TTGAAAACCCACAGAACCGTATCAAGGGTGTGATAGGGAAAGTTATGCGAATCATTTG  
GCGGAAGTAGCAATGGCAACGTACGGTTTATCGCATACAAGGAATACAAAAGTTGGTAAC  
GACATCGTCAGAGGTGTTTCCGGTGGTGAAGGAAGCGTGTCTCCATTGCTGAAGTCTCC  
ATCTGTGGATCCAAATTTCAATGCTGGGATAATGCTACAAGGGGTTGGATTCCGCTACCG  
CTTTGGAATTTATTCGTGCCTTAAAGACTCAAGCTGATATTTCCAATACATCTGCCACAGT  
GGCCATCTATCAATGTTCTCAAGATGCGTACGACTTGTTCAATAAAGTCTGTGTTTTGGAT  
GATGGTTATCAGATCTACTATGGCCCCGCCGATAAGGCCAAGAAGTACTTTGAAGATATG  
GGGTATGTTTGTCCAAGCAGACAAACCACCGCAGATTTTTTGACCTCAGTTACAAGTCCCT  
CTGAGAGAACCCTGAACAAAGATATGCTAAAAAAAGGTATTCATATACCACAGACCCCGA  
AGGAAATGAACGATTACTGGGTAAAATCTCCAAATTACAAAGAGCTAATGAAAGAAGTC  
GACCAACGATTATTGAATGACGATGAAGCAAGCCGTGAAGCTATTAAGGAAGCCCACATT  
GCTAAGCAGTCCAAGAGAGCAAGACCTTCCTCTCCTTATACTGTCAGCTACATGATGCAA  
GTTAAATACCTATTAATCAGAAATATGTGGAGACTGCGAAATAATATCGGGTTTACATTAT  
TTATGATTTTTGGGTAAGTGTAGTATGGCTTTAATCTTGGGTTCAATGTTTTTCAAGATCATG  
AAAAAGGGTGATACTTCTACATTCTATTTCCGTGGTTCTGCTATGTTTTTGAATTCTATT  
CAATGCATTTTCTCTCTGTTAGAAATCTTTTCGTTATATGAGGCCAGACCAATCACTGAA

AAACATAGAACATATTCGTTATACCATCCAAGTGCTGACGCTTTTGCATCAGTTCTATCAG  
AAATACCCCTCAAAGTTAATCATCGCTGTTTGCTTCAATATAATCTTCTATTTCTTAGTAGAC  
TTTAGAAGAAATGGTGGTGTATTCTTTTTCTACTTATTAATAAACATTGTGCGGTTTTCTC  
CATGTCTCACTTGTTTAGATGTGTTGGTTCCTTAACAAAGACATTGTGAGAAGCTATGGTT  
CCCGCTTCTATGTTATTGTTGGCTCTATCCATGTATACCGGTTTTGCTATTCCTAAGAAGAA  
GATCCTACGTTGGTCTAAATGGATTGGTATATCAATCCGTTGGCTTACTTATTCGAATCTT  
TGTTAATTAACGAGTTTCATGGTATAAAATTCCCCTGCGCTGAATATGTTCCCTCGTGGTCT  
GCGTATGCAAACATTTCTAGTACAGAATCTGTTTGTACCGTGGTTGGAGCTGTTCCAGGCC  
AAGACTATGTTCTGGGTGATGATTCATTAGAGGAACTTATCAATACTACCACAAAGACA  
AATGGCGTGGTTTTCGGTATTGGTATGGCTTATGTCGTCTTCTTTTTCTTGTCTATCTATTCT  
TATGTGAATACAACGAGGGTGCTAAACAAAAAGGTGAAATATTAGTTTTCCACGCAGTA  
TAGTTAAAAGAATGAAGAAAAGAGGTGTACTAAGTAAAAGAATGCAATGACCCCGAA  
AACGTTGGGGAACGTAGTGACTTATCCAGCGATAGGAAAATGCTACAAGAAAGCTCTGAA  
GAGGAATCCGATACTTACGGAGAAATTGGTTTATCCAAGTCAGAGGCTATATTTCACTGG  
AGAAACCTTTGTTACGAAGTTCAGATTAAGGCCGAAACAAGACGTATTTTGAACAATGTT  
GATGGTTGGGTAAACCAGGTAATTAACAGCTTAAATGGGTGCTTCAGGTGCTGGTAAAA  
CCCACTTCTGGATTGTTTGGCCGAAAGGGTTACCATGGGTGTTATAACTGGTGATATCTT  
GGTCAATGGTATTCCCCGTGATAAATCTTCCCGAGATCCATTGGTTATTGTCAGCAACAA  
GATTTGCATTTGAAAACCTGCCACTGTGAGGGAGTCATTGAGATTTTCTGCTTACCTACGTC  
AACCAGCTGAAGTTTCCATTGAAGAAAAGAACAGATATGTTGAAGAAGTTATTAATAATTC  
TTGAAATGGAAAAATATGCTGATGCTGTTGTTGGTGTGCTGGTGAAGGTTTAAACGTTGA  
ACAAAGAAAAAGATTAACCATTGGTGTGTAATTAAGTCCAAACCAAACTGTTGGTCTT  
TTTAGATGAACCTACTTCTGGTTTGGATTCTCAAAGTCTGGTCTATTTGTCAGCTAATGA  
AAAAGTTGGCAAATCATGGTCAAGCAATTCTATGTACTATTCACCAACCCTCTGCTATTTT  
GATGCAAGAATTCGATCGTTTACTATTTATGCAACGTGGTGGTAAGACTGTCTACTTTGGC  
GACTTGGGCGAAGGTTGTAATAACTATGATCGATTATTTGAAAGCCATGGTGCTCATAAAT  
GCCCTGCTGACGCCAACCCAGCTGAATGGATGCTAGAAAGTTGTTGGTGCAGCTCCAGGCT  
CTCATGCAAATCAAGATTATTACGAAGTTTGGAGGAATTCTGAAGAGTACAGGGCCGTTT  
AATCTGAATTAGATTGGATGGAAAGAGAATTACCAAAGAAAGGTTTCGATAACTGCAGCTG  
AGGACAAACACGAATTTTACAATCAATTATTTATCAAACAAAATTGGTCAAGTATTCGTCT  
ATTCCAGCAATATTGGAGATCTCCAGATTATTTATGGTCAAGTTTATTTTAACTATTTTCA  
ATCAATTGTTTCATCGTTTTCACTTTCTTCAAAGCAGGAACCTCGCTACAGGGTTTACAAAA  
TCAAATGTTGGCTGTGTTTACGTTTATTTTCAATCCTATTCTACAACAATACCTAC  
CATCTTTTGTCCAGCAAAGAGATTTGTATGAGGCCAGGGAACGCCCTCAAGGACTTTTTTC  
TTGGATTTCAATTTATCTTCGCTCAAATATTCGTGGAAGTTCCATGGAATATATTGGCAGGT

ACTATTGCTTATTTTATCTACTATTATCCAATTGGATTTTACTCCAACGCGTCTGCAGCTGG  
CCAGTTGCATGAAAGGGGTGCTTTATTTTGGTTGTTCTCTTGTGCTTTCTACGTTTATGTTG  
GTTCTATGGGTCTGCTTGTCAATTCATTCAACCAAGTTGCAGAAAGTGCAGCTAACTTAGC  
CTCTTTGTTGTTTACAATGTCTTTGTCTTTTTGTGGTGTTATGACTACCCCAAGTGCCATGC  
CTAGATTTTGGATATTCATGTACAGGGTTTCACCTTTGACTTATTTCAATCAGGCTCTGTTG  
GCTGTTGGTGTTGCTAACGTAGACGTCAAATGCGCTGATTACGAATTGCTAGAATTCACAC  
CACCATCCGGTATGACATGTGGCAGTACATGGAACCATATTTACAACCTAGCAAAGACTG  
GTTACTTAACTGATGAAAATGCCACTGACACCTGTAGTTTCTGTCAAATATCTACAACCAA  
TGATTACTTAGCTAATGTCAATTCTTTCTACAGTGAGAGATGGAGAAATTATGGTATCTTC  
ATCTGTTATATTGCATTCAATTATATCGCTGGTGTCTTTTTCTACTGGTTAGCAAGAGTGCC  
TAAAAAGAACGGTAAACTCTCCAAGAAATAG

## References

1. M. Gutmann, C. Hoischen and R. Krämer, *Biochim Biophys Acta*, 1992, **1112**, 115-123.
2. K. Chen, C. Liu, M. Shao, Z. Xu, T. Yang and Z. Rao, *Systems Microbio. Biomanufact.*, 2021, DOI: 10.1007/s43393-021-00063-7.
3. C. Liu, K. Chen, Y. Wang, M. Shao, Z. Xu and Z. Rao, *Biochem. Engin. J.*, 2022, **177**.
